# Supplementary material for: NASQAR: a web-based platform for high-throughput sequencing data analysis and visualization
Source: Springer Nature journal article supplement (doi:10.1186/s12859-020-03577-4), 2020-06-29
Supplement: 12859_2020_3577_MOESM1_ESM.pdf [file 12859_2020_3577_MOESM1_ESM.pdf]

## SUPPLEMENTARY MATERIALS FOR:

### NASQAR: A web-based platform for High-throughput sequencing data analysis and visualization

Ayman Yousif<sup>1</sup>, Nizar Drou<sup>1</sup>, Jillian Rowe<sup>1</sup>, Mohammed Khalfan<sup>2</sup> and Kristin C. Gunsalus<sup>1,2,\*</sup>

<sup>1</sup>NYU Abu Dhabi Center for Genomics & Systems Biology, Division of Biological Sciences, Abu Dhabi, United Arab Emirates and

<sup>2</sup>Center for Genomics & Systems Biology, Department of Biology, New York University, New York, 10003, United States.

\*To whom correspondence should be addressed.

#### 1) NASQAR platform and implementation details:

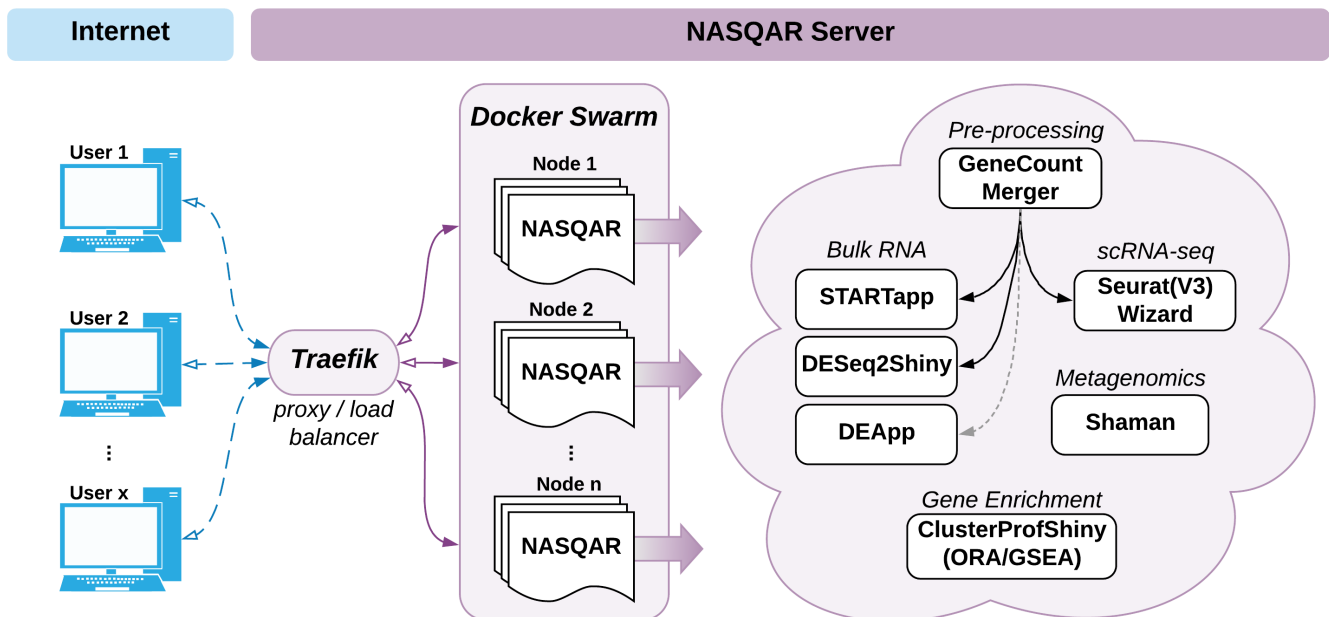

**Fig. 1.** NASQAR Platform Architecture. A cluster of virtual machines at NYU Abu Dhabi serves NASQAR applications to multiple concurrent users. Applications are containerized and managed on the cluster using Docker and Swarm, while Traefik load-balances requests among available server nodes. Functionality includes merging gene counts, conversion of gene IDs to gene names, analysis of differential mRNA expression, metagenomics analysis, and gene set and functional enrichment analysis. Applications for bulk expression analysis include DESeq2, limma, and EdgeR. Single-cell RNAseq analysis with Seurat Wizards is built on top of the Seurat R package and includes options for filtering, normalization, dimensionality reduction (PCA), clustering, and t-SNE. Enrichment analysis includes applications for Gene Set Enrichment Analysis (GSEA) and Over-representation Analysis (ORA) built using the clusterProfiler R package.

The architectural framework of the NASQAR web platform is illustrated in Figure 1. NASQAR has been deployed on a cluster of virtual machines and is publicly accessible at <http://nasqar.abudhabi.nyu.edu/>. Docker (Merkel 2014) and Swarm (Soppelsa and Kaewkasi 2017) provide containerization and cluster management, and the Traefik reverse proxy / load balancer (<https://traefik.io/>) manages requests and maintains sticky user sessions, which is essential for hosting Shiny applications. This framework allows access to multiple users concurrently while providing sufficient resources (RAM/CPU) for the applications. In anticipation of growing computational demand and the addition of

more applications, the scalable design makes it relatively easy to increase dedicated resources simply by adding more nodes to the cluster.

A Docker image of NASQAR is publicly available through DockerHub and can be used to deploy the application seamlessly on any system with Docker installed, whether a local computer or a public server. In addition, each application can be installed and launched on its own, saving users from the hassle of satisfying the different software and hardware requirements. The source code is available publicly on GitHub and is actively maintained. All applications have clear user guides with example data sets to help users get started and acclimate quickly.

NASQAR comprises a collection of applications primarily implemented in R, a widely used and freely available statistical programming language (R Core Team 2017). Most of the analysis workflows are built using R libraries for genomics and computation. The front-end design utilizes the R Shiny (Chang *et al.* 2018) library and is supported by JavaScript/CSS to enhance usability and improve overall user experience.

In addition to previously published software, we introduce here several new applications we have developed that wrap around popular analysis packages, such as DESeq2 (Love *et al.* 2014) and Seurat (Butler *et al.* 2018) for bulk and single-cell RNA-seq analysis and visualization, respectively. Since most of the analysis applications in NASQAR require a matrix of gene counts as input, we have also built a convenient tool to assist with preprocessing, GeneCountMerger. Some of the applications have been integrated to provide a seamless transition from data preprocessing to downstream analysis. This implementation gives users the option of using multiple analysis applications without having to modify/reformat the input data set, thus allowing them to easily benchmark and compare the performance of different analysis software packages.

The following is a description of each application currently hosted by NASQAR:

### **1.1 GeneCountMerger**

This preprocessing tool is used to merge individual raw gene count files produced from software such as htseq-count (Pyl *et al.* 2014) or featurecounts (Smyth *et al.* 2013). Options include:

- Merge individual sample count files into one matrix \_
- Merge multiple raw count matrices \_
- Convert Ensembl gene IDs to gene names \_
- Select from available genomes / versions \_
- Add pseudocounts \_
- Rename sample column headers \_
- Download merged counts file in .csv format \_
- Seamless transcriptome analysis following count merger (Seurat \_Wizard for single-cell RNA analysis; DESeq2Shiny or START (Sklenar *et al.* 2016) for bulk RNA analysis) \_

### **1.2 Seurat Wizards**

Seurat Wizards are wizard-style web-based interactive applications to perform guided single-cell RNA-seq data analysis and visualization. They are based on Seurat, a popular R package designed for QC, analysis, and exploration of single-cell RNAseq data. The wizard style makes it intuitive to go back and forth between steps and adjust parameters based on the results/feedback of different

outputs/plots/steps, giving the user the ability to interactively tune the analysis. SeuratWizard and SeuratV3Wizard implementations provide support for Seurat versions 2 and 3 (Stuart *et al.* 2019), respectively. \_

Another web-based tool for scRNA-seq analysis, IS-CellR(Patel 2018), has recently been described that also utilizes Seurat v2. The SeuratWizard and SeuratV3Wizard take a different approach to design and implementation and follow closely the Seurat Guided Clustering Tutorials devised by the authors ([https://satijalab.org/seurat/v3.0/pbmc3k\\_tutorial.html](https://satijalab.org/seurat/v3.0/pbmc3k_tutorial.html)). Users can follow the tutorials while using the Wizards and can edit parameters at almost every step, which is instrumental in producing accurate results. A unique feature of the Seurat Wizards is that they can accept as input processed 10X Genomics data files in place of a matrix of gene counts, which eliminates the need for this additional pre-processing step. SeuratV3Wizard integrates several additional features like the UCSC Cell Browser (<https://github.com/maximilianh/cellBrowser>), enabling users to interactively visualize clusters and gene markers, and the newly published sctransform method (Hafemeister and Satija 2019), which gives users the ability to run the analysis using two slightly different workflows and compare the results. These differences in features and design give the Seurat Wizards more versatility and improve usability in comparison with other publicly available implementations of Seurat.

### **1.3 Deseq2Shiny**

The Deseq2Shiny app is a Shiny wrapper around DESeq2, a popular R package for performing differential mRNA expression analysis of RNA-seq data. This web-based application implements the standard default workflow outlined in the DESeq2 Bioconductor tutorial (<https://bioconductor.org/packages/devel/bioc/vignettes/DESeq2/inst/doc/DESeq2.html>). This includes normalization, data transformation (e.g., rlog and vst for clustering), and estimation for dispersion and log fold change. This app follows the same implementation as other apps on NASQAR, whereby users can fine tune the analysis parameters interactively.

### **1.4 ClusterProfilerShiny**

The ClusterProfilerShiny apps wrap the popular clusterProfiler (Yu *et al.* 2012) package, which implements methods to analyze and visualize functional profiles of genomic coordinates, genes, and gene clusters. Users can upload their own data from DESeq2 or import data from the upstream Deseq2Shiny app. These apps allow for quick and easy over-representation analysis (ORA) and gene set enrichment analysis (GSEA) of GO terms and KEGG pathways. Visuals produced include dot plots, word clouds, category net plots, enrichment map plots, GO induced graphs, GSEA plots, and enriched KEGG pathway plots using the Pathview package (Luo and Brouwer 2013).

### **1.5 Other open-source apps**

- START: a web-based RNA-seq analysis and visualization resource. We have modified this application slightly from the open-source version to add options to some plots. We have also integrated it with GeneCountMerger so that once merging gene counts is complete, users can launch the START app and have their merged matrix data loaded automatically. \_
- DEApp (Li and Andrade 2017): an interactive web application for differential expression analysis. \_

- Shaman (Quereda *et al.* 2016): a Shiny application that enables the identification of differentially abundant genera within metagenomic datasets. It wraps around the Generalized Linear Model implemented in DESeq2. It includes multiple visualizations, and is compatible with common metagenomic file formats. \_

## 2) Launch NASQAR using Docker (Recommended):

The recommended way to get NASQAR running is using Docker. The reason is that applications hosted within NASQAR have many package dependencies (R and OS) that might be tedious and very time consuming for the average user especially when trying to support different OS's (Windows/Linux/OSX).

**Prerequisite:** Make sure Docker (version  $\geq$  17.03.0-ce, <https://docs.docker.com/install/>) is installed.

Run NASQAR docker image as follows:

- a) `docker run -p 80:80 aymanm/nasqarall:nasqar` (runs on port 80)  
If you are running this in your personal laptop/PC, access NASQAR using a modern web browser at the following URL <http://localhost/>
- b) `docker run -p 8083:80 aymanm/nasqarall:nasqar` (runs on port 8083)  
If you are running this in your personal laptop/PC, access NASQAR using a modern web browser at the following URL <http://localhost:8083/>
- c) If you are hosting this as a service at your organization, make sure the specified port is not blocked with a firewall so users can access the service. Execute the same commands as a) and b). Users can access NASQAR using a modern web browser at the following URL [http://<server\\_ip>:port/](http://<server_ip>:port/)

**Note:** All apps in NASQAR can be launched individually. Visit each app's GitHub page for relevant instructions. For 3<sup>rd</sup> party apps hosted on NASQAR, please refer to their Github repositories.

### App GitHub pages:

- \_ SeuratV3Wizard (scRNA): <https://github.com/nasqar/seuratv3wizard>
- \_ SeuratWizard (scRNA): <https://github.com/nasqar/SeuratWizard>
- \_ deseq2shiny (Bulk RNA): <https://github.com/nasqar/deseq2shiny>
- \_ GeneCountMerger (Pre-processing): <https://github.com/nasqar/GeneCountMerger>
- \_ ClusterProfShinyGSEA (Enrichment): <https://github.com/nasqar/ClusterProfShinyGSEA>
- \_ ClusterProfShinyORA (Enrichment): <https://github.com/nasqar/ClusterProfShinyORA>
- \_ NASQAR (main page): <https://github.com/nasqar/NASQAR>

### 3) Example Use Case 1 (DGE and GSEA):

In this example we will show, using only your web browser, how you can start with individual sample gene count files (eg output of htseq counts) and carry out Differential Gene Expression (DGE) and Gene Set Enrichment analysis using DESeq2 and clusterProfiler R packages respectively.

The datasets provided in this example use case have been download from the ENSEMBL expression ATLAS (<https://www.ebi.ac.uk/gxa/experiments/E-MTAB-970/Results>). They belong to the ENSEMBL expression ATLAS experiment title **“Transcription profiling by high throughput sequencing of Sox17.Epi and Endo cells from mouse embryos”** ([dataset] 2016). The data comprises of 6 mouse RNA-seq samples, across two conditions. They were selected as an example dataset only, no other criteria were used in their selection.

#### Step 1: Merge counts (GeneCountMerger):

- Download example count files zip from here (<https://drive.google.com/file/d/1OB2vojHqscLAHZWGETHdGK0yaZ9r06PT/iew?usp=sharing>)
- Extract zip file
- Launch GeneCountMerger <http://nasqar.abudhabi.nyu.edu/GeneCountMerger/>
- Click browse and select all gene count files:

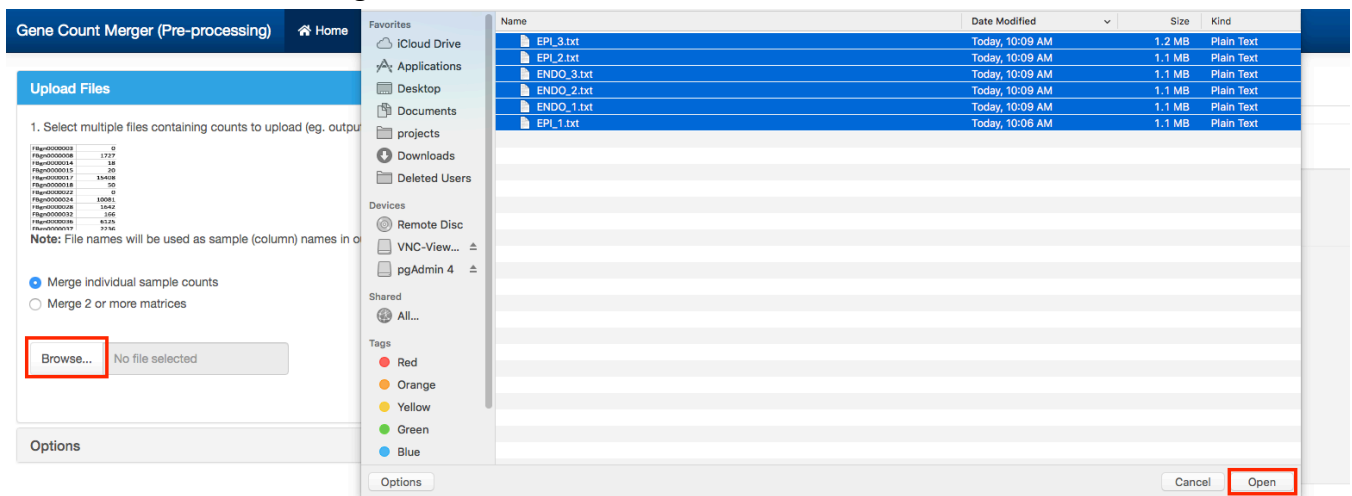

#### 2) Sample Input Files:

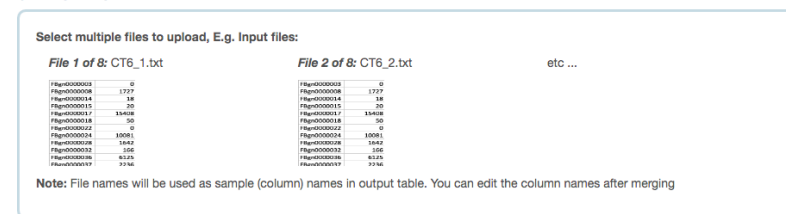

#### 3) Sample Output File:

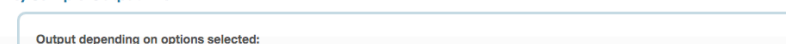

e) Once loaded, click the red Merge button. Now all counts files have been consolidated into one table. You can now download and save it as a .csv file

Gene Count Merger (Pre-processing) Home Terms of Use

Upload Files

Options

Add +1 to counts (Pseudocounts)

Retrieve gene names from ensembl ids

Merge Files

**Transcriptome Analysis (Optional):**  
Start your analysis by launching the appropriate application for your data  
Your merged counts data will be automatically loaded

Select Analysis Type:

Single-Cell RNA  
Seurat Wizard

Bulk RNA  
DESeq2  
START

User Guide Output

Merged counts

Edit Column Names

Download Merged File

Show 10 entries

| gene.ids            | EPI_3  | EPI_2  | ENDO_3 | EN   |
|---------------------|--------|--------|--------|------|
| ENSMUSG000000000001 | 3526   | 1439   | 2578   | 2684 |
| ENSMUSG000000000003 | 0      | 0      | 0      | 0    |
| ENSMUSG000000000028 | 550    | 959    | 531    | 483  |
| ENSMUSG000000000031 | 122670 | 141366 | 46628  | 3930 |
| ENSMUSG000000000037 | 58     | 56     | 63     | 52   |
| ENSMUSG000000000049 | 0      | 0      | 0      | 0    |
| ENSMUSG000000000056 | 1006   | 2090   | 395    | 229  |
| ENSMUSG000000000058 | 31     | 170    | 149    | 157  |
| ENSMUSG000000000078 | 714    | 678    | 1947   | 1601 |
| ENSMUSG000000000085 | 1035   | 199    | 407    | 252  |

gene.ids EPI\_3 EPI\_2 ENDO\_3 EN

Showing 1 to 10 of 53,465 entries

## Step 2: Differential Gene Expression analysis (Deseq2Shiny):

a) Carrying on from the previous step, under “Select Analysis Type” select “DESeq2”

Gene Count Merger (Pre-processing) Home Terms of Use

Upload Files

Options

Add +1 to counts (Pseudocounts)

Retrieve gene names from ensembl ids

Merge Files

**Transcriptome Analysis (Optional):**  
Start your analysis by launching the appropriate application for your data  
Your merged counts data will be automatically loaded

Select Analysis Type:

Single-Cell RNA  
Seurat Wizard

Bulk RNA  
DESeq2  
START

User Guide Output

Merged counts

Edit Column Names

Download Merged File

Show 10 entries

| gene.ids            | EPI_3  | EPI_2  | ENDO_3 | EN   |
|---------------------|--------|--------|--------|------|
| ENSMUSG000000000001 | 3526   | 1439   | 2578   | 2684 |
| ENSMUSG000000000003 | 0      | 0      | 0      | 0    |
| ENSMUSG000000000028 | 550    | 959    | 531    | 483  |
| ENSMUSG000000000031 | 122670 | 141366 | 46628  | 3930 |
| ENSMUSG000000000037 | 58     | 56     | 63     | 52   |
| ENSMUSG000000000049 | 0      | 0      | 0      | 0    |
| ENSMUSG000000000056 | 1006   | 2090   | 395    | 229  |
| ENSMUSG000000000058 | 31     | 170    | 149    | 157  |
| ENSMUSG000000000078 | 714    | 678    | 1947   | 1601 |
| ENSMUSG000000000085 | 1035   | 199    | 407    | 252  |

Showing 1 to 10 of 53,465 entries

b) The DESeq2Shiny app will be launched in a new tab, with all counts data already loaded onto it. You can set the minimum number of counts to 1000 for example (this is mainly for speed up, you can continue with out it) and click “Filter”. Then click “Next: Conditions”

DESeq2 Shiny

0. User Guide

1. Input Data

Upload Gene Counts

Config & Prefilter

No Replicates

\* Column names must indicate replicates by underscores (eg. sample\_X\_1,sample\_X\_2, etc ...)

(Optional) Minimum number of counts to include for each gene (Default 0, to include all)

1000

Filter

This step is not necessary, but can speed up the processing time

Next: Conditions

Gene Counts Table

Show 10 entries

|                     | EPI_3  | EPI_2  | ENDO_3 | EN |
|---------------------|--------|--------|--------|----|
| ENSMUSG000000000001 | 3526   | 1439   | 2578   |    |
| ENSMUSG000000000028 | 550    | 959    | 531    |    |
| ENSMUSG000000000031 | 122670 | 141366 | 46628  |    |
| ENSMUSG000000000056 | 1006   | 2090   | 395    |    |
| ENSMUSG000000000078 | 714    | 678    | 1947   |    |
| ENSMUSG000000000085 | 1035   | 199    | 407    |    |
| ENSMUSG000000000088 | 559    | 304    | 837    |    |
| ENSMUSG000000000131 | 1697   | 1407   | 1766   |    |
| ENSMUSG000000000134 | 301    | 267    | 388    |    |
| ENSMUSG000000000142 | 1011   | 485    | 111    |    |

Showing 1 to 10 of 7,552 entries

Previous 1 2

c) You can verify the sample/conditions table on the left, then click “Run DESeq2”. The replicate/condition IDs are inferred from the naming of the raw counts files. For example, ENDO\_1 will be automatically determined to mean that the sample belongs to the condition

“ENDO”, and that it is the first replicate. In case a user supplies filenames that are named differently, this page will allow users to tag their replicates to the appropriate conditions.

The screenshot shows the 'Conditions/Factors (Optional)' section of the DESeq2 Shiny application. It features an 'Edit Table' with 6 rows and 2 columns: 'Samples' and 'Conditions'. The rows are: 1 EPI\_3 EPI, 2 EPI\_2 EPI, 3 ENDO\_3 ENDO, 4 ENDO\_2 ENDO, 5 ENDO\_1 ENDO, 6 EPI\_1 EPI. To the right, there are input fields for 'Condition/Factor Name' (with 'Eg. Time' as a placeholder) and a 'List of Conditions/Factors (comma separated)' field (with 'Eg. 1hr, 5hr, 6hr' as a placeholder). Below these is a 'Remove Columns' section with a dropdown menu set to 'Conditions' and a red 'Remove' button. A 'Run' button with a green 'Run DESeq2' label is visible in the top right corner.

d) Once DESeq2 has completed, you will be able to see rlog/vst transformation matrices and PCA and distance heatmap plots.

The screenshot shows the 'Run DESeq' results page. At the top, there are two tabs: 'RLog' and 'Var Stabilizing Trans.', both highlighted with red boxes. Below the tabs are two main plots: a 'Distance Heatmap' on the left and a 'PCA Plot' on the right. The heatmap shows a color scale from 0 to 80, with dendrograms on the top and left. The PCA plot shows PC1 (72% variance) on the x-axis and PC2 (19% variance) on the y-axis, with points colored by group: ENDO (red) and EPI (teal). Below the plots is a table of gene expression data with columns for EPI\_3, EPI\_2, ENDO\_3, ENDO\_2, ENDO\_1, and EPI\_1. A search bar and a 'Download rlog.csv' button are also visible.

|                     | EPI_3            | EPI_2            | ENDO_3           | ENDO_2           | ENDO_1           | EPI_1            |
|---------------------|------------------|------------------|------------------|------------------|------------------|------------------|
| ENSMUSG00000000001  | 11.2748028474133 | 10.7498488238069 | 11.3229674087928 | 11.6130529825993 | 11.5925462168007 | 11.1571714599582 |
| ENSMUSG000000000028 | 8.82836859455593 | 9.6232175151972  | 9.08849305053959 | 9.20517976920268 | 9.29137793847448 | 8.74410006061468 |
| ENSMUSG000000000031 | 16.3737568717413 | 16.0716314483101 | 16.608623934037  | 16.7674912848093 | 16.7692565887643 | 16.7818553587426 |



- e) Next, go to “DE Results” to be able to run comparisons between different sample conditions. Select two different conditions, for example “EPI” and “ENDO” and then click “Get Results”

The screenshot shows the DESeq2 Shiny web application interface. The main heading is "Differential Expression Comparison". Below this, there are two dropdown menus: "Condition 1" and "Condition 2". The "Condition 1" dropdown is currently set to "EPI" and the "Condition 2" dropdown is set to "ENDO". To the right of these dropdowns is a blue button labeled "Get Results". On the left side of the interface, there is a vertical sidebar with several menu items: "0. User Guide", "1. Input Data", "2. Edit Conditions & Run", "3. Run DESeq2", "DE Results" (which is highlighted with a red box), "Gene Boxplot", and "Heatmap".

- f) Scroll down and you can see the DE comparison results. Click “Download .csv”. This will save a CSV file locally called “EPI\_vs\_ENDO.csv”.

The screenshot shows the DESeq2 Shiny web application interface at the "DE Results" step. The main heading is "Differential Expression Comparison". Below this, there are two dropdown menus: "Condition 1" and "Condition 2". The "Condition 1" dropdown is currently set to "EPI" and the "Condition 2" dropdown is set to "ENDO". To the right of these dropdowns is a blue button labeled "Get Results". Below the comparison settings, there are two panels: "MA Plot Settings" and "MA Plot". The "MA Plot Settings" panel has a slider for "Adjusted p-value threshold" set to 0.1 and a text input for "Y Axis range abs value" set to 8. The "MA Plot" panel shows a scatter plot titled "EPI\_vs\_ENDO" with "log2 fold change" on the y-axis and "mean of normalized counts" on the x-axis. Below the plots, there is a table of results. The table has columns for "baseMean", "log2FoldChange", "lfcSE", "stat", "pvalue", and "padj". A "Download .csv" button is highlighted in the bottom right corner.

|                     | baseMean         | log2FoldChange      | lfcSE             | stat               | pvalue             | padj               |
|---------------------|------------------|---------------------|-------------------|--------------------|--------------------|--------------------|
| ENSMUSG000000000001 | 2581.00387520778 | -0.600010672809525  | 0.312118852206317 | -1.92237882642509  | 0.0545581078433861 | 0.19016304972141   |
| ENSMUSG000000000028 | 589.717664209934 | -0.0883117307996088 | 0.536854240184615 | -0.164498525277997 | 0.869338707592496  | 0.940759748341336  |
| ENSMUSG000000000031 | 88199.6173627417 | 1.01727552759025    | 0.319192101254636 | 3.18703227176264   | 0.0014374073567019 | 0.0129737947109751 |

g) There are other visualization plots like gene box plots and clustered heatmap

### Box Plots:

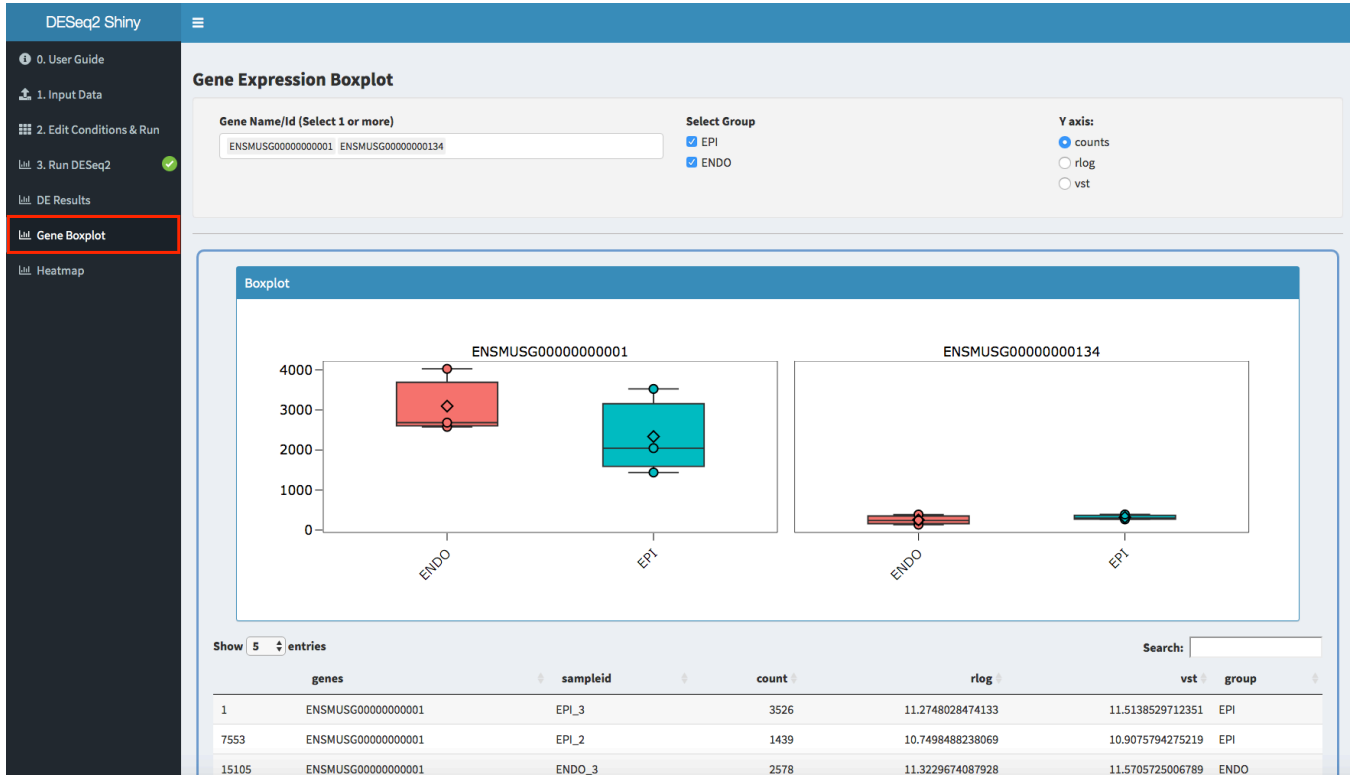

### Clustered Heatmap:

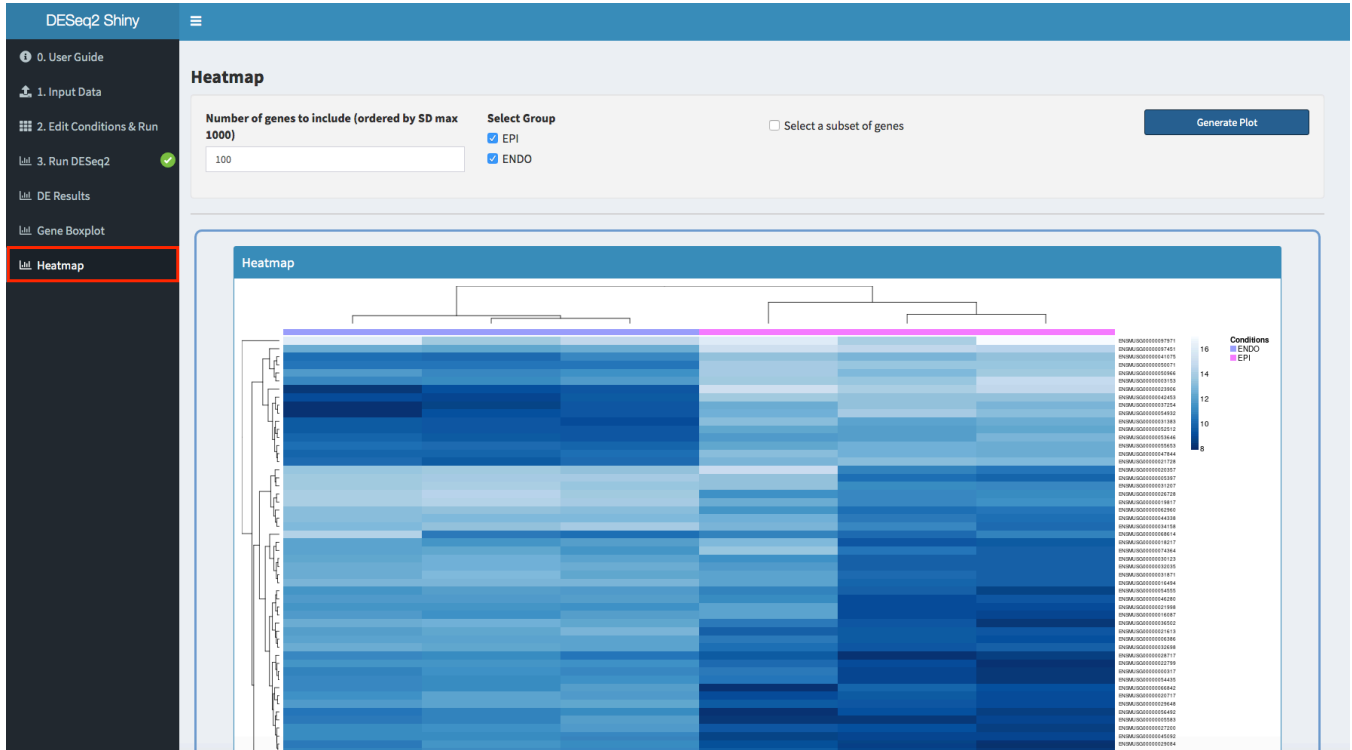

### Step 3: Gene Set Enrichment Analysis (GSEA):

a) Launch ClusterProfShinyGSEA <http://nasqar.abudhabi.nyu.edu/ClusterProfShinyGSEA/>

The screenshot shows the 'User Guide' page of the ClusterProfShinyGSEA application. The page has a dark sidebar on the left with 'User Guide' and 'Input Data' options. The main content area is titled 'User Guide' and 'Introduction'. The text describes the application as a web-based interactive tool for analyzing and visualizing functional profiles of genomic coordinates, gene and gene clusters. It mentions that users can upload their own differential gene expression (DGE) data from DESeq2 or import data from the upstream Deseq2Shiny app. The application allows for quick and easy Gene Set Enrichment Analysis (GSEA) of GO-Terms and KEGG pathways. It is designed to provide an intuitive interface for researchers to easily upload and perform GSEA on RNA-seq data interactively with no prior programming knowledge in R. Visuals produced include dot plots, category net plots, enrichment map plots, GO induced graphs, gsea plots, and enriched KEGG pathway plots using the Pathview package. The application follows a tutorial, and users are directed to see Figure 1 for example output plots. Figure 1 is a collage of six plots: Dot plot, Category Netplot, Ridge Plot, GO induced graph, Pathview plot, and PubMed Trends.

b) Go to “Input Data” tab and click “Browse”

The screenshot shows the 'Input Data' tab of the ClusterProfShinyGSEA application. The sidebar on the left has 'Input Data' highlighted with a red box. The main content area is titled 'Upload Data' and has a green header. It contains two sections: 'Use example file or upload your own data' and 'Choose File(s) Containing Data'. In the first section, 'Upload .CSV' is selected with a radio button, and 'Example Data' is unselected. Below this, it says 'CSV counts file'. In the second section, there is a 'Browse...' button highlighted with a red box, and a text box that says 'No file selected'. To the right of the main content area, there is a 'Data Contents Table:' section with a note: 'Note: if there are more than 20 columns, Please select a file'.

- c) Select the DE results file downloaded in the previous section (Section 2, Step f) from Deseq2Shiny (**EPI\_vs\_ENDO.csv**) to upload.
- d) In the tab “Initialize Parameters”, make sure to select the correct column name that corresponds to the LogFC column and click “**Next**”

The screenshot shows the 'Initialize Parameters' section of the ClusterProfShinyGSEA interface. The 'Select Genes column' is set to 'X'. The 'Select Log2FC column' dropdown is set to 'log2FoldChange', which is highlighted with a red box. Below this, the 'Next' button is also highlighted with a red box. To the right, a 'Data Contents Table' is visible, showing a list of genes with columns for X, baseMean, log2FoldChange, and lfcSE. The first 10 entries are shown, with a search bar and pagination controls at the bottom.

| X  | baseMean         | log2FoldChange      | lfcSE             |
|----|------------------|---------------------|-------------------|
| 1  | 2581.00387520778 | -0.600010672809525  | 0.312118852206317 |
| 2  | 589.717664209934 | -0.0883117307996088 | 0.536854240184615 |
| 3  | 88199.6173627417 | 1.01727552759025    | 0.319192101254636 |
| 4  | 795.477625243704 | 1.67324663007695    | 0.545191067970216 |
| 5  | 1301.32984150348 | -1.91518967548144   | 0.314279896062619 |
| 6  | 460.01699653675  | 0.134018162925686   | 0.597400897223845 |
| 7  | 644.695846291811 | -0.518993974265429  | 0.514609171387553 |
| 8  | 1465.26321917403 | -0.0483227098953547 | 0.304714852161395 |
| 9  | 277.421425670315 | 0.254155091724301   | 0.602604570954306 |
| 10 | 423.876752051572 | 2.10181536714133    | 0.473297112716227 |

- e) Select “**Mouse (org.Mm.eg.db)**” as the organism and click “**Create gseGO Object**” to start the analysis

The screenshot shows the 'gseGO object Parameters' section of the ClusterProfShinyGSEA interface. The 'Organism' dropdown is set to 'Mouse (org.Mm.eg.db)', which is highlighted with a red box. Other parameters include Keytype: ENSEMBL, Ontology: ALL, Permutation #: 1000, minGSSize: 10, maxGSSize: 500, P-Value Cutoff: 0.05, pAdjustMethod: none, and keggKeyType: ncbi-geneid. The 'Create gseGO Object' button at the bottom is highlighted with a red box. To the right, the 'Data Contents Table' is visible, showing the same list of genes as in the previous screenshot.

| X  | baseMean         | log2FoldChange      | lfcSE             |
|----|------------------|---------------------|-------------------|
| 1  | 2581.00387520778 | -0.600010672809525  | 0.312118852206317 |
| 2  | 589.717664209934 | -0.0883117307996088 | 0.536854240184615 |
| 3  | 88199.6173627417 | 1.01727552759025    | 0.319192101254636 |
| 4  | 795.477625243704 | 1.67324663007695    | 0.545191067970216 |
| 5  | 1301.32984150348 | -1.91518967548144   | 0.314279896062619 |
| 6  | 460.01699653675  | 0.134018162925686   | 0.597400897223845 |
| 7  | 644.695846291811 | -0.518993974265429  | 0.514609171387553 |
| 8  | 1465.26321917403 | -0.0483227098953547 | 0.304714852161395 |
| 9  | 277.421425670315 | 0.254155091724301   | 0.602604570954306 |
| 10 | 423.876752051572 | 2.10181536714133    | 0.473297112716227 |

f) Now you can see the gseGO results table. Next go to “gseKegg Results” tab to view gseKEGG results table.

The screenshot displays the ClusterProfShinyGSEA web application interface. The sidebar on the left contains navigation options: User Guide, Input Data, gseGO Results, gseKegg Results (highlighted with a red box), Go Plots, KEGG Plots, Pathview Plots, and PubMed GO Trends. The main content area is titled "gseGO Results" and features a table of GO terms. The table has columns for ONTOLOGY, ID, Description, setSize, enrichmentScore, NES, pvalue, and p-adj. The table shows 10 entries, with the first entry being GO:0022610 (BP) for biological adhesion. Below the table, there are buttons for "Save Results as CSV File", "gseGO Plots", and "Search PubMed Trends". The footer of the table indicates "Showing 1 to 10 of 1,096 entries" and includes a pagination control with "Previous" and buttons for 1, 2, 3, 4, and 5.

| ONTOLOGY   | ID | Description | setSize                                     | enrichmentScore | NES               | pvalue           | p-adj               |                 |
|------------|----|-------------|---------------------------------------------|-----------------|-------------------|------------------|---------------------|-----------------|
| GO:0022610 | BP | GO:0022610  | biological adhesion                         | 480             | 0.396824511097627 | 1.63755835165066 | 0.00107181136120043 | 0.0010718113612 |
| GO:0003008 | BP | GO:0003008  | system process                              | 486             | 0.365788245326475 | 1.51023602552791 | 0.00107411385606874 | 0.0010741138560 |
| GO:0007155 | BP | GO:0007155  | cell adhesion                               | 478             | 0.397590628732639 | 1.63901449069537 | 0.0010752688172043  | 0.001075268817  |
| GO:0030054 | CC | GO:0030054  | cell junction                               | 491             | 0.360044315149601 | 1.48563748014617 | 0.0010752688172043  | 0.001075268817  |
| GO:0060284 | BP | GO:0060284  | regulation of cell development              | 491             | 0.336675292536326 | 1.38921075041364 | 0.0010752688172043  | 0.001075268817  |
| GO:0006629 | BP | GO:0006629  | lipid metabolic process                     | 468             | 0.3807491380411   | 1.56746315972686 | 0.00107758620689655 | 0.0010775862068 |
| GO:0005576 | CC | GO:0005576  | extracellular region                        | 462             | 0.480159769800442 | 1.97894715690213 | 0.00107874865156419 | 0.0010787486515 |
| GO:0006811 | BP | GO:0006811  | ion transport                               | 462             | 0.364631226856369 | 1.50280380633522 | 0.00107874865156419 | 0.0010787486515 |
| GO:0045597 | BP | GO:0045597  | positive regulation of cell differentiation | 467             | 0.340818766673338 | 1.40309112772801 | 0.00107874865156419 | 0.0010787486515 |
| GO:0051960 | BP | GO:0051960  | regulation of nervous system development    | 461             | 0.36147718895238  | 1.48972864598756 | 0.00107874865156419 | 0.0010787486515 |

g) Here are the Kegg results with an output that indicates the percentage of genes that were not mapped. Next go to “GO Plots” tab

**gseKEGG Results**

Show all columns

Save Results as CSV File

gseKEGG Plots

Generate Pathview Plot

**Output warning:**

'select()' returned 1:many mapping between keys and columns

Warning in bitr(names(original\_gene\_list), fromType = input\$keytype, toType = "ENTREZID", :  
**1.69% of input gene IDs are fail to map...**

| ID       | Description                                            | setSize | enrichmentScore    | NES               | pvalue              | p.adj           |
|----------|--------------------------------------------------------|---------|--------------------|-------------------|---------------------|-----------------|
| mmu05217 | Basal cell carcinoma                                   | 31      | 0.68309777663621   | 1.95767401179503  | 0.0015527950310559  | 0.001552795031  |
| mmu04979 | Cholesterol metabolism                                 | 22      | 0.789899471334981  | 2.09776722488622  | 0.00157977883096367 | 0.0015797788309 |
| mmu05142 | Chagas disease (American trypanosomiasis)              | 48      | -0.523405778058465 | -1.86194139919046 | 0.00284090909090909 | 0.0028409090909 |
| mmu05235 | PD-L1 expression and PD-1 checkpoint pathway in cancer | 48      | -0.527147054601231 | -1.87525045685244 | 0.00284090909090909 | 0.0028409090909 |
| mmu04664 | Fc epsilon RI signaling pathway                        | 34      | -0.536561190395437 | -1.77715263384678 | 0.00284900284900285 | 0.0028490028490 |
| mmu05410 | Hypertrophic cardiomyopathy (HCM)                      | 36      | -0.546705815577029 | -1.82187752874525 | 0.00285714285714286 | 0.0028571428571 |
| mmu04662 | B cell receptor signaling pathway                      | 40      | -0.581860153083151 | -1.99825206980193 | 0.0028735632183908  | 0.002873563218  |
| mmu04380 | Osteoclast differentiation                             | 53      | -0.472310994305009 | -1.71484673072237 | 0.00302114803625378 | 0.0030211480362 |
| mmu00480 | Glutathione metabolism                                 | 28      | 0.621775828049997  | 1.7394231269981   | 0.0031496062992126  | 0.003149606299  |
| mmu04930 | Type II diabetes mellitus                              | 22      | 0.678851836758747  | 1.80285363566523  | 0.00315955766192733 | 0.0031595576619 |

Showing 1 to 10 of 57 entries

h) There are several plots to explore (Dot plot, Enrichment map)

**GO Plots**

number of categories to show: 10

**Dot Plot**

lipid metabolic process  
 regulator of nervous system development  
 cell adhesion  
 biological adhesion  
 extracellular region  
 cell junction  
 positive regulation of cell differentiation  
 regulation of cell development  
 system process  
 ion transport

GeneRatio

Count: 90, 100, 110

p.adjust: 0.001072, 0.001074, 0.001076, 0.001078

**Enrichment plot map**

number of categories to show: 10

cell junction  
 regulation of nervous system development  
 positive regulation of cell differentiation  
 biological adhesion  
 system process  
 regulation of cell development

size: 95, 100, 105, 110

p.adjust: 0.001072, 0.001074

i) Ridge plot and GSEA plot

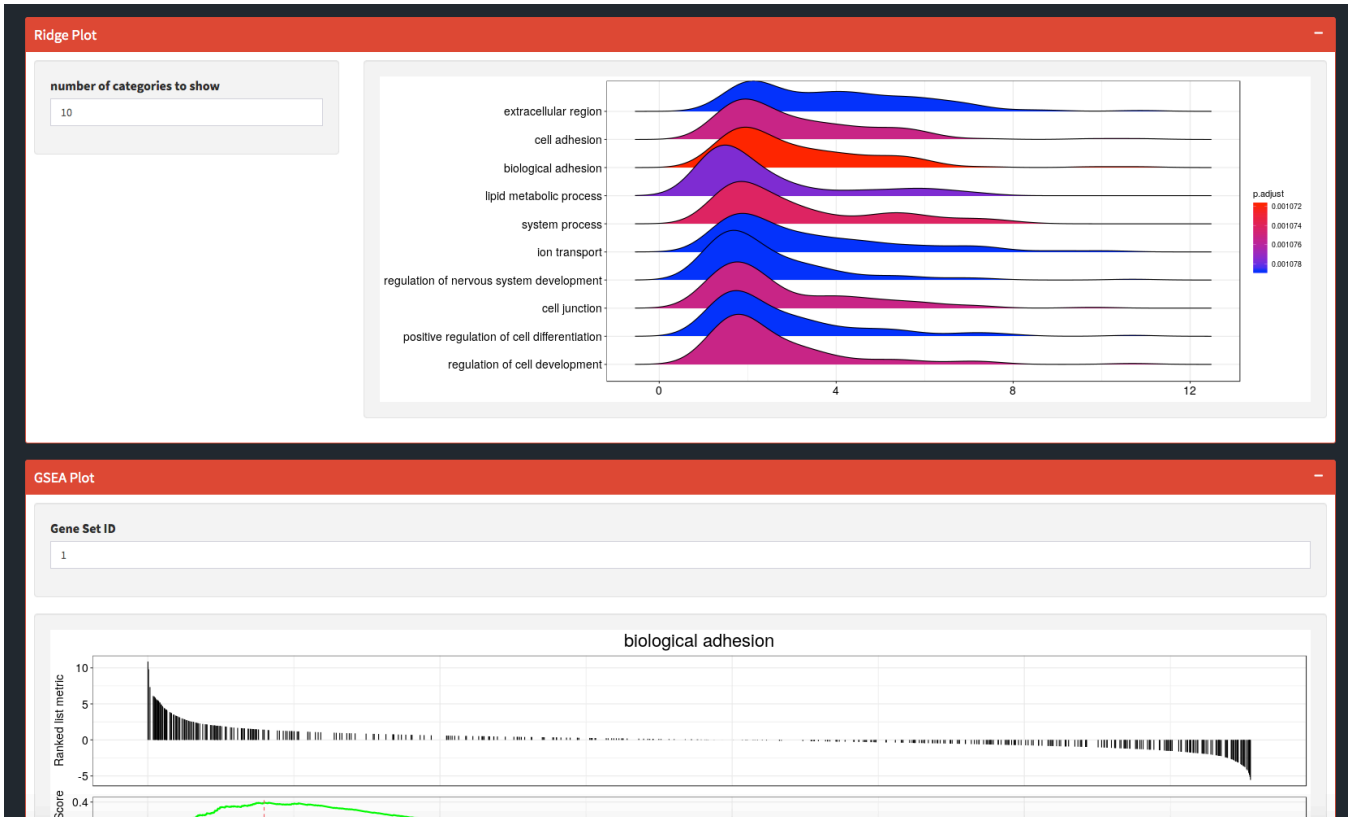

j) Next go to “Pathview Plots” tab and select gene “mmu05217” and click “Generate Pathview”

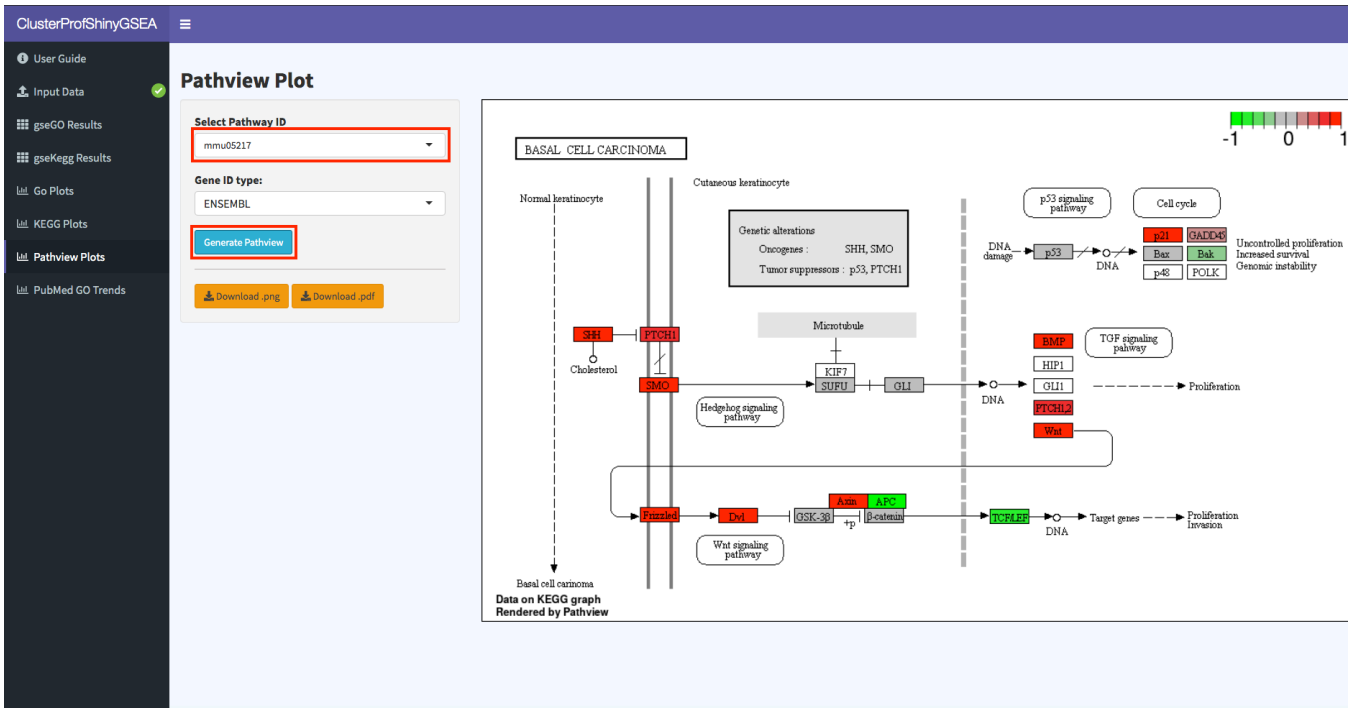

k) Last step is to check pubmed trends for enriched categories. Select a few GO terms and click **“Plot Trends”**

ClusterProfShinyGSEA

- User Guide
- Input Data
- gseGO Results
- gseKegg Results
- Go Plots
- KEGG Plots
- Pathview Plots
- PubMed GO Trends**

### PubMed Trends of Enriched Terms

**Trends**

From: 2010  
To: 2018

**Select GO Terms**

biological adhesion system process cell adhesion  
regulation of cell development

**Plot Trends**

| Year | biological adhesion | cell adhesion | regulation of cell development | system process |
|------|---------------------|---------------|--------------------------------|----------------|
| 2010 | ~20,000             | ~30,000       | ~80,000                        | ~150,000       |
| 2011 | ~20,000             | ~30,000       | ~90,000                        | ~180,000       |
| 2012 | ~20,000             | ~30,000       | ~100,000                       | ~200,000       |
| 2013 | ~20,000             | ~30,000       | ~110,000                       | ~220,000       |
| 2014 | ~20,000             | ~30,000       | ~115,000                       | ~240,000       |
| 2015 | ~20,000             | ~30,000       | ~120,000                       | ~260,000       |
| 2016 | ~20,000             | ~30,000       | ~115,000                       | ~280,000       |
| 2017 | ~20,000             | ~30,000       | ~130,000                       | ~300,000       |
| 2018 | ~20,000             | ~30,000       | ~120,000                       | ~280,000       |



#### 4) Example Use Case 2 (scRNA-seq analysis using Seurat):

In this example we will show how you can easily upload your single-cell RNA seq sample data (10X format, using the 10x genomics cellranger pipeline) and perform a guided single-cell data analysis and visualization using the popular Seurat library. You can follow along using the Seurat tutorial ([https://satijalab.org/seurat/v3.0/pbmc3k\\_tutorial.html](https://satijalab.org/seurat/v3.0/pbmc3k_tutorial.html)), which the SeuratV3Wizard mirrors closely.

- a) Download and extract data file from [https://s3-us-west-2.amazonaws.com/10x.files/samples/cell/pbmc3k/pbmc3k\\_filtered\\_gene\\_bc\\_matrices.tar.gz](https://s3-us-west-2.amazonaws.com/10x.files/samples/cell/pbmc3k/pbmc3k_filtered_gene_bc_matrices.tar.gz)
- b) Launch SeuratV3Wizard (<http://nasqar.abudhabi.nyu.edu/SeuratV3Wizard/>)

SeuratV3 Wizard

User Guide

Input Data

### User Guide

## Introduction

This is a web-based interactive (wizard style) application to perform a **guided single-cell RNA-seq data analysis and clustering** based on **Seurat**.

The wizard style makes it intuitive to go back between steps and adjust parameters based on different outputs/plots, giving the user the ability to use feedback in order to guide the analysis iteratively.

It is meant to provide an intuitive interface for researchers to easily **upload, analyze, visualize, and explore single-cell RNA-seq data** interactively with no prior programming knowledge in R.

It is based on **Seurat**, an R package designed for QC, analysis, and exploration of single cell RNA-seq data.

The application follows the **Seurat - Guided Clustering Tutorial** workflow closely. It also provides additional functionalities to further explore and visualize the data.

See **Figure 1** below for a diagram that outlines all the workflow steps and their expected output

*Figure 1: Workflow (Click figure to enlarge)*



| Step       | Details                                                          | Outputs       |
|------------|------------------------------------------------------------------|---------------|
| Input Data | 10X Genomics Cell Ranger Output (filtered gene-barcode matrices) | Seurat Object |

c) Go to “Input Data” tab and select “Upload Data (10X)”

The screenshot shows the SeuratV3 Wizard interface. On the left, the 'Input Data' tab is selected. The main area displays the 'Upload Data' dialog box with the following options:

- Upload Data (nonUMI)
- Upload Data (10X)
- Example Data (PBMC)

Below the options, it states: "10X Data, 1 .mtx file, and 2 .tsv files". Under the heading "Choose File(s) Containing Data", there is a "Browse..." button and a "No file selected" button.

To the right, the "Data Contents Table:" section contains a note: "Note: if there are more than 20 columns, only the first 2" followed by two red prompts: "Please select a file" and "Please select a file".

d) Browse for the extracted data files downloaded earlier. Select all 3 files to upload

The screenshot shows a file browser window with the following table of files:

| Name         | Date Modified         | Size    | Kind            |
|--------------|-----------------------|---------|-----------------|
| barcodes.tsv | Oct 24, 2018, 2:54 PM | 46 KB   | Tab se...values |
| genes.tsv    | Oct 24, 2018, 2:54 PM | 817 KB  | Tab se...values |
| matrix.mtx   | Oct 24, 2018, 2:54 PM | 28.2 MB | Document        |

The three files are highlighted in blue. The "Open" button at the bottom right is also highlighted.

e) Click “Next Step: QC & Filter Cells”

SeuratV3 Wizard

User Guide

Input Data

Upload Data +

Initial Parameters -

Project Name  
Project1

Minimum number of cells per gene  
3

Minimum number of genes per cell  
200

Next Step: QC & Filter Cells

Data Contents Table:

Note: if there are more than 20 columns, only the first 20 will show here  
dense size: 709548272 sparse size: 29861992  
Show 10 entries

|               | AAACATACAACCAC | AAACATTGAGCTAC | AAACATTGATCAGC | AAACCGTGC |
|---------------|----------------|----------------|----------------|-----------|
| MIR1302-10    | 0              | 0              | 0              |           |
| FAM138A       | 0              | 0              | 0              |           |
| OR4F5         | 0              | 0              | 0              |           |
| RP11-34P13.7  | 0              | 0              | 0              |           |
| RP11-34P13.8  | 0              | 0              | 0              |           |
| AL627309.1    | 0              | 0              | 0              |           |
| RP11-34P13.14 | 0              | 0              | 0              |           |
| RP11-34P13.9  | 0              | 0              | 0              |           |

f) Add a regular expression for mitochondrial genes by adding the **regex** and **label** as seen below, and then click “Add Filter”. You can use the “Test Regex” tab in order to verify that the regular expression the user supplies works as expected.

SeuratV3 Wizard

User Guide

Input Data

QC & Filter **Next**

QC & Filter (Preprocessing)

Filter Cells

Seurat allows you to easily explore QC metrics and filter cells based on any user-defined criteria. You can visualize gene and molecule counts, plot clear outlier number of genes detected as potential multipllets. This is not a guaranteed method to exclude cell doublets, see tutorial for more in can filter cells based on the percentage of mitochondrial genes present.

Filter Options:

1) By Regular Expression:

By Regex Expression: ^MT-

Label (no spaces): mito

Test Regex

+ Add Filter

Filter Expressions

Genes that match Regex

g) Scroll down and click “Submit Data”

**2) Select Specific Genes:**

**Label (no spaces)**  
Eg. mito.genes

**Select Genes**  
Start typing gene name

**3) Copy/Paste Specific Genes:**

**Paste List Of Genes**

**Label (no spaces)**  
Eg. ribosomal

**Delimiter**  
(comma)

Add genes

**Added Genes**

Submit Data

h) Select the low and high thresholds to filter out cells. Click “Filter Cells (within thresholds)”. This is an interactive filter that will display the effects of applying different filtering thresholds on the data.

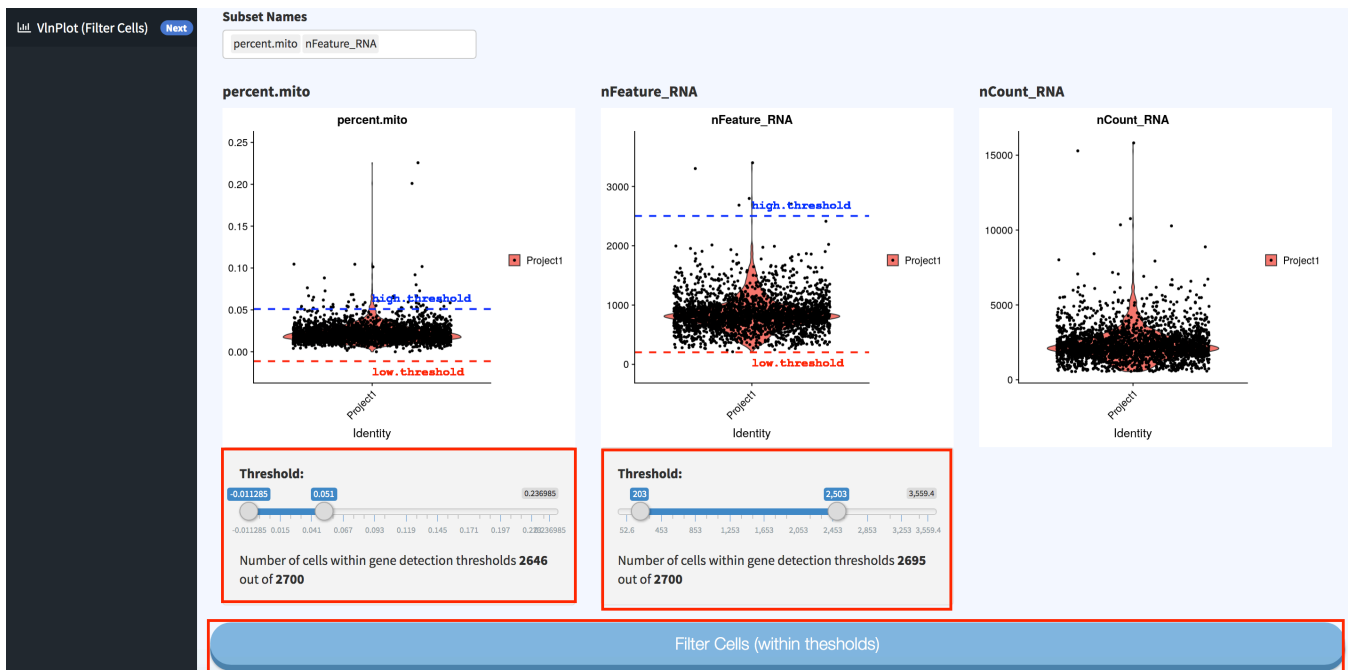

- i) There are now two options to proceed within the analysis. We will choose the default one so we can mirror the tutorial. The second option is the SCTransform method (<https://rawgit.com/ChristophH/sctransform/master/inst/doc/seurat.html> )

## Normalize, Select Var. Features, Scale Data

Choose which method to proceed with:

- Normalize / Detect Var Features / Scale Data (Default)
- SCTransform: using regularized negative binomial regression

- j) Proceed by clicking “Normalize / Find Var. Features / Scala Data”

|                                      |                                      |
|--------------------------------------|--------------------------------------|
| <b>Mean Function</b><br>ExpMean      | <b>Dispersion Function</b><br>LogVMR |
| <b>X Low Cut-off value</b><br>0.0125 | <b>X High Cut-off value</b><br>3     |
| <b>Y Cut-off value</b><br>0.5        |                                      |

**Scaling the data and removing unwanted sources of variation**

Your single cell dataset likely contains ‘uninteresting’ sources of variation. This could include not only technical noise, but batch effects, or even biological sources of variation (cell cycle stage). As suggested in Buettner et al, NBT, 2015, regressing these signals out of the analysis can improve downstream dimensionality reduction and clustering. To mitigate the effect of these signals, Seurat constructs linear models to predict gene expression based on user-defined variables. The scaled z-scored residuals of these models are stored in the scale.data slot, and are used for dimensionality reduction and clustering.

We can regress out cell-cell variation in gene expression driven by batch (if applicable), cell alignment rate (as provided by Drop-seq tools for Drop-seq data), the number of detected molecules, and mitochondrial gene expression. Refer to tutorial to see an example of regressing on the number of detected molecules per cell as well as the percentage mitochondrial gene content for post-mitotic blood cells.

**Variables to regress out**

nCount\_RNA percent.mito

Normalize / Find Var. Features / Scale Data

k) Now you can follow the default settings in the wizard to go through the steps until **“Elbow/Jackstraw”**. Click **“Show Elbow Plot”** and click **“Next Step: Cluster Cells”**

The screenshot shows the SeuratV3 Wizard interface. On the left is a dark sidebar with a list of steps: User Guide, Input Data, QC & Filter, VlnPlot (Filter Cells), Norm/Detect/Scale, PCA Reduction, Viz PCA Plot, PCA Plot, PC Heatmap, **Elbow/JackStraw** (highlighted with a red box and a green checkmark), and Cluster Cells (with a blue 'Next' button). The main panel is titled 'Determine statistically significant PCs:' and contains explanatory text about PC selection. Below the text is a section titled '1) PC Elbow Plot (quick)' with a description and a 'Show Elbow Plot' button (highlighted with a red box). The plot shows 'Standard Deviation' on the y-axis (ranging from 2 to 5) and 'PC' on the x-axis (ranging from 0 to 10). The data points show a sharp drop in standard deviation after the first few PCs, indicating a clear 'elbow' point. Below the plot is a 'Next Step: Cluster Cells' button (highlighted with a red box).

**Determine statistically significant PCs:**

To overcome the extensive technical noise in any single gene for scRNA-seq data, Seurat clusters cells based on their PCA across a correlated gene set. Determining how many PCs to include downstream is therefore an important step.

PC selection – identifying the true dimensionality of a dataset – is an important step for Seurat, but can be challenging/un

The first is more supervised, exploring PCs to determine relevant sources of heterogeneity, and could be used in conjuncti

The second implements a statistical test based on a random null model, but is time-consuming for large datasets, and ma

The third is a heuristic that is commonly used, and can be calculated instantly.

**1) PC Elbow Plot (quick)**

A more ad hoc method for determining which PCs to use is to look at a plot of the standard deviations of the principle be done with PCElbowPlot.

Show Elbow Plot

Standard Deviation

PC

Next Step: Cluster Cells

l) Next run “Cluster Cells” and go to “Non-linear Reduction” tab and “Run TSNE Reduction”

SeuratV3 Wizard

User Guide

Input Data ✓

QC & Filter ✓

VlnPlot (Filter Cells) ✓

Norm/Detect/Scale ✓

PCA Reduction ✓

Viz PCA Plot

PCA Plot

PC Heatmap

Elbow/JackStraw ✓

Cluster Cells ✓

**Non-linear Reduction** Next

### Run Non-linear dimensional reduction (tSNE)

**Parameters**

Seurat continues to use tSNE as a powerful tool to visualize and explore these datasets. While we no longer advise clustering components, cells within the graph-based clusters determined above should co-localize on the tSNE plot. This is because t with similar local neighborhoods in high-dimensional space together in low-dimensional space. As input to the tSNE, we su input to the clustering analysis, although computing the tSNE based on scaled gene expression is also supported using the

**Dimensions(PC) To Use (1):** 1

**Dimensions(PC) To Use (2):** 10

**Perplexity:** 30

Once running the reduction is complete, you can also view/download cells in each cluster

**Run TSNE Reduction**

m) Once tSNE step is done, we can now go to the next step “Next Step: Find Cluster Markers” and click “Find Cluster Markers”

SeuratV3 Wizard

User Guide

Input Data ✓

QC & Filter ✓

VlnPlot (Filter Cells) ✓

Norm/Detect/Scale ✓

PCA Reduction ✓

Viz PCA Plot

PCA Plot

PC Heatmap

Elbow/JackStraw ✓

Cluster Cells ✓

**Non-linear Reduction** ✓

**Cluster Markers** Next

Viz Markers

Download Seurat Obj

### Run Non-linear dimensional reduction (tSNE)

**Parameters**

Seurat continues to use tSNE as a powerful tool to visualize and explore these datasets. While we no longer advise clustering directly on tSNE components, cells within the graph-based clusters determined above should co-localize on the tSNE plot. This is because the tSNE aims to place cells with similar local neighborhoods in high-dimensional space together in low-dimensional space. As input to the tSNE, we suggest using the same PCs as input to the clustering analysis, although computing the tSNE based on scaled gene expression is also supported using the genes.use argument.

**Dimensions(PC) To Use (1):** 1

**Dimensions(PC) To Use (2):** 10

**Perplexity:** 30

Once running the reduction is complete, you can also view/download cells in each cluster

TSNE Plot [Find Cells in Clusters](#)

**TSNE Plot**

Color by:

Clusters

Samples

**Next Step: Find Cluster Markers**

Download Seurat Object

TSNE\_2

TSNE\_1

- n) Now you can see the markers table (which is downloadable). There is also an option to explore the clusters and markers visually using UCSC Cellbrowser (<https://github.com/maximilianh/cellBrowser>). Click **“Generate Cell browser data”**. Once done you can launch the cellbrowser by clicking on **“Launch Cellbrowser”**.

**Finding differentially expressed genes (cluster biomarkers)**

Seurat can help you find markers that define clusters via differential expression. By default, it identifies positive and negative markers of a single cluster (specified in ident.1), compared to all other cells. FindAllMarkers automates this process for all clusters, but you can also test groups of clusters vs. each other, or against all cells.

The min.pct argument requires a gene to be detected at a minimum percentage in either of the two groups of cells, and the thresh.test argument requires a gene to be differentially expressed (on average) by some amount between the two groups. You can set both of these to 0, but with a dramatic increase in time - since this will test a large number of genes that are unlikely to be highly discriminatory. As another option to speed up these computations, max.cells.per.ident can be set. This will downsample each identity class to have no more cells than whatever this is set to. While there is generally going to be a loss in power, the speed increases can be significant and the most highly differentially expressed genes will likely still rise to the top.

Find all markers | Find markers by cluster | Find markers by cluster vs other clusters | Heatmap

Find All Markers:

Min % (min.pct): 0.25 | Test to use: wilcox | Logfc Thresh: 0.25

# top genes to show per cluster (0 to show all): 0 | Show Only Positive Markers:

**Find Cluster Markers**

**UCSC Cell Browser (Optional)**

Use this cell browser to explore data visually:

- 1) Generate the cell browser data
- 2) Launch the browser in a new tab once data is generated

**Generate Cell Browser data**

**Launch Cellbrowser**

**Save Results as CSV File**

Show 10 entries

|       | p_val                 | avg_logFC         | pct.1 | pct.2 | p_val_adj             | cluster | gene  |
|-------|-----------------------|-------------------|-------|-------|-----------------------|---------|-------|
| RPS12 | 4.31139393095762e-153 | 0.539587257193845 | 1     | 0.992 | 5.91264563691528e-149 | 0       | RPS12 |
| RPS6  | 1.00902742096281e-138 | 0.472207626363035 | 1     | 0.995 | 1.38378020510839e-134 | 0       | RPS6  |
| RPL32 | 8.12078124239672e-130 | 0.434588058871905 | 0.998 | 0.995 | 1.11368393958229e-125 | 0       | RPL32 |
| RPS14 | 8.06844021232411e-120 | 0.431387984833155 | 1     | 0.995 | 1.10650589071813e-115 | 0       | RPS14 |



o) A tab is opened with UCSC cellbrowser

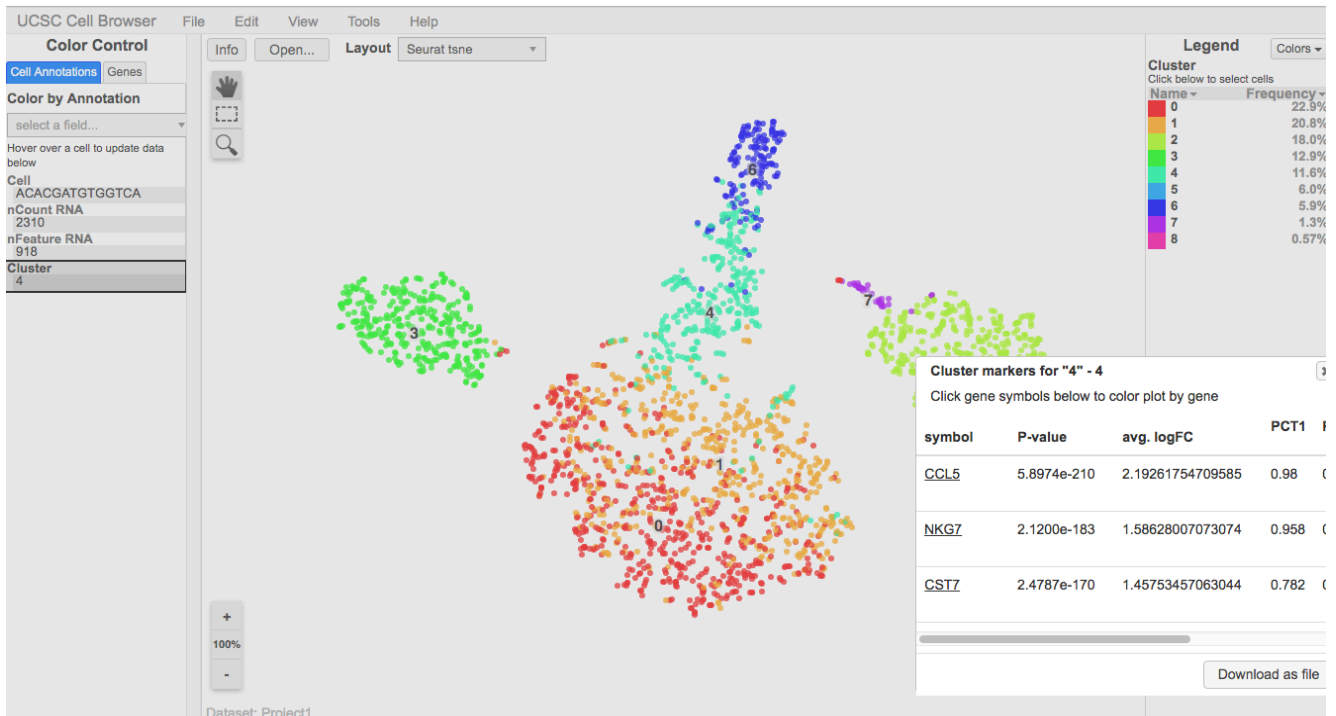

p) Last step would be to download the Seurat object for reproducibility and further analysis in R. Go to the last tab **"Download Seurat Obj"**. Click **"Generate Seurat Obj"**, once done click **"Download Seurat Obj"** when it appears. You can also download the R script used for generating this analysis but clicking **"Generate Seurat Script"**.

SeuratV3 Wizard

- User Guide
- Input Data
- QC & Filter
- VlnPlot (Filter Cells)
- Norm/Detect/Scale
- PCA Reduction
- Viz PCA Plot
- PCA Plot
- PC Heatmap
- Elbow/JackStraw
- Cluster Cells
- Non-linear Reduction
- Cluster Markers
- Viz Markers
- Download Seurat Obj

**Download R Object/Script**

You can save the object at this point so that it can easily be loaded back in R for further analysis & exploration without having to rerun the computationally intensive steps performed above, or easily shared with collaborators.

It is also recommended that you keep it as a reference.

Generate Seurat Robj

Download Seurat Obj

Generate and Download the R script to reproduce these steps in R/RStudio

Please note that you need to edit the data file(s)/directory path in the script before you run it in R/RStudio

Generate Seurat Script

Download Seurat Script

## References

- Merkel, D. (2014). Docker: Lightweight linux containers for consistent development and deployment. *Linux J.*, 2014(239).
- Soppelsa, F. and Kaewkasi, C. (2017). *Native Docker Clustering with Swarm*. Packt Publishing.
- R Core Team (2017). *R: A Language and Environment for Statistical Computing*. R Foundation for Statistical Computing, <https://www.R-project.org/>.
- Chang, W., Cheng, J., Allaire, J., Xie, Y., and McPherson, J. (2018). *shiny: Web Application Framework for R*. R package version 1.1.0.
- Love, M. I., Huber, W., and Anders, S. (2014). Moderated estimation of fold change and dispersion for rna-seq data with *deseq2*. *Genome Biology*, 15, 550.
- Butler, A., Hoffman, P., Smibert, P., Papalexi, E., and Satija, R. (2018). Integrating single-cell transcriptomic data across different conditions, technologies, and species. *Nature Biotechnology*, 36, 411.
- Pyl, P. T., Anders, S., and Huber, W. (2014). HTSeq—a Python framework to work with high-throughput sequencing data. *Bioinformatics*, 31(2), 166–169.
- Smyth, G. K., Shi, W., and Liao, Y. (2013). featureCounts: an efficient general purpose program for assigning sequence reads to genomic features. *Bioinformatics*, 30(7), 923–930.
- Sklenar, J., Nelson, J. W., Minnier, J., and Barnes, A. P. (2016). The START App: a web-based RNAseq analysis and visualization resource. *Bioinformatics*, 33(3), 447–449.
- Stuart, T. and Satija, R. (2019). Integrative single-cell analysis. *Nature Reviews Genetics*, 20(5), 257–272.
- Patel, M. V. (2018). iS-CellR: a user-friendly tool for analyzing and visualizing single-cell RNA sequencing data. *Bioinformatics*, 34(24), 4305–4306.
- Hafemeister, C. and Satija, R. (2019). Normalization and variance stabilization of single-cell rna-seq data using regularized negative binomial regression. *bioRxiv*.
- Yu, G., Wang, L.-G., Han, Y., and He, Q.-Y. (2012). clusterProfiler: an R package for comparing biological themes among gene clusters. *OMICS: A Journal of Integrative Biology*, 16(5), 284–287.
- Luo, W. and Brouwer, C. (2013). Pathview: an R/Bioconductor package for pathway- Li, Y. and

Andrade, J. (2017). Deapp: an interactive web interface for differential expression analysis of next generation sequence data. *Source Code for Biology and Medicine*, 12(1), 2. *\_based data integration and visualization. Bioinformatics*, 29(14), 1830–1831.

Quereda, J. J., Dussurget, O., Nahori, M.-A., Ghozlane, A., Volant, S., Dillies, M.-A., Regnault, B., Kennedy, S., Mondot, S., Villoing, B., Cossart, P., and Pizarro-Cerda, J. (2016). Bacteriocin from epidemic listeria strains alters the host intestinal microbiota to favor infection. *Proceedings of the National Academy of Sciences*, 113(20), 5706–5711.

Choi, E. , Kraus, M. R., Lemaire, L. A., Yoshimoto, M. , Vemula, S. , Potter, L. A., Manduchi, E. , Stoeckert, C. J., Grapin\_Botton, A. and Magnuson, M. A. (2012), Dual Lineage\_Specific Expression of Sox17 During Mouse Embryogenesis. *STEM CELLS*, 30: 2297-2308.

[dataset] (2016). Transcription profiling by high throughput sequencing of Sox17.Epi and Endo cells from mouse embryos, atlas-experiments, V1. <http://www.ebi.ac.uk/gxa/experiments/E-MTAB-970>.
